# Supplementary material for: Efficient Metabolic Fingerprinting of Follicular Fluid Encodes Ovarian Reserve and Fertility
Source: PubMed Central journal article supplement (PMC10427401; doi:10.1002/advs.202302023), 2023-06-13
Supplement: ADVS-10-2302023-s001.pdf [file ADVS-10-2302023-s001.pdf]

## Supporting Information

for *Adv. Sci.*, DOI 10.1002/adv.202302023

Efficient Metabolic Fingerprinting of Follicular Fluid Encodes Ovarian Reserve and Fertility

*Jiao Wu, Chunmei Liang, Xin Wang, Yida Huang, Wanshan Liu, Ruimin Wang, Jing Cao, Xun Su, Tao Yin, Xiaolei Wang, Zhikang Zhang, Lingchao Shen, Danyang Li, Weiwei Zou, Ji Wu, Lihua Qiu, Wen Di, Yunxia Cao\*, Dongmei Ji\* and Kun Qian\**

## Efficient metabolic fingerprinting of follicular fluid encodes ovarian reserve and fertility

Jiao Wu<sup>1,2,3†</sup>, Chunmei Liang<sup>4,5,6†</sup>, Xin Wang<sup>4†</sup>, Yida Huang<sup>1,2,3</sup>, Wanshan Liu<sup>1,2,3</sup>, Ruimin Wang<sup>1,2,3</sup>, Jing Cao<sup>1,2,3</sup>, Xun Su<sup>4</sup>, Tao Yin<sup>4</sup>, Xiaolei Wang<sup>4</sup>, Zhikang Zhang<sup>4</sup>, Lingchao Shen<sup>4</sup>, Danyang Li<sup>4</sup>, Weiwei Zou<sup>4,5,6</sup>, Ji Wu<sup>7,8</sup>, Lihua Qiu<sup>1,9</sup>, Wen Di<sup>1,9</sup>, Yunxia Cao<sup>4,5,6\*</sup>, Dongmei Ji<sup>4,5,6\*</sup>, Kun Qian<sup>1,2,3\*</sup>

### Affiliation

<sup>1</sup>Shanghai Key Laboratory of Gynecologic Oncology, Department of Obstetrics and Gynecology, Renji Hospital, School of Medicine, Shanghai Jiao Tong University, Shanghai 200127, P. R. China

<sup>2</sup>State Key Laboratory for Oncogenes and Related Genes, School of Biomedical Engineering and Institute of Medical Robotics, Shanghai Jiao Tong University, Shanghai 200030, P. R. China

<sup>3</sup>Division of Cardiology, Renji Hospital, School of Medicine, Shanghai Jiao Tong University, Shanghai 200127, P. R. China

<sup>4</sup>Department of Obstetrics and Gynecology, the First Affiliated Hospital of Anhui Medical University, Hefei 230022, P. R. China.

<sup>5</sup>NHC Key Laboratory of Study on Abnormal Gametes and Reproductive Tract, Anhui Medical University, Hefei 230032, P. R. China.

<sup>6</sup>Key Laboratory of Population Health Across Life Cycle, Anhui Medical University, Hefei 230032, P. R. China.

<sup>7</sup>Key Laboratory for the Genetics of Developmental & Neuropsychiatric Disorders (Ministry of Education), Renji Hospital, Bio-X Institutes, School of Medicine, Shanghai Jiao Tong University, Shanghai 200240, P. R. China.

<sup>8</sup>Key Laboratory of Fertility Preservation and Maintenance of Ministry of Education, Ningxia Medical University, Yinchuan 750003, P. R. China.

<sup>9</sup>Department of Obstetrics and Gynecology, Ren Ji Hospital, School of Medicine, Shanghai Jiao Tong University, Shanghai 200127, P. R. China

†Jiao Wu, Chunmei Liang, Xin Wang contributed equally to this work.

\*Corresponding authors. Email: k.qian@sjtu.edu.cn, jidongmei@ahmu.edu.cn, caoyunxia5972@ahmu.edu.cn

### Contents

|                             |
|-----------------------------|
| Supplementary Figures (1-6) |
| Supplementary Tables (1-11) |

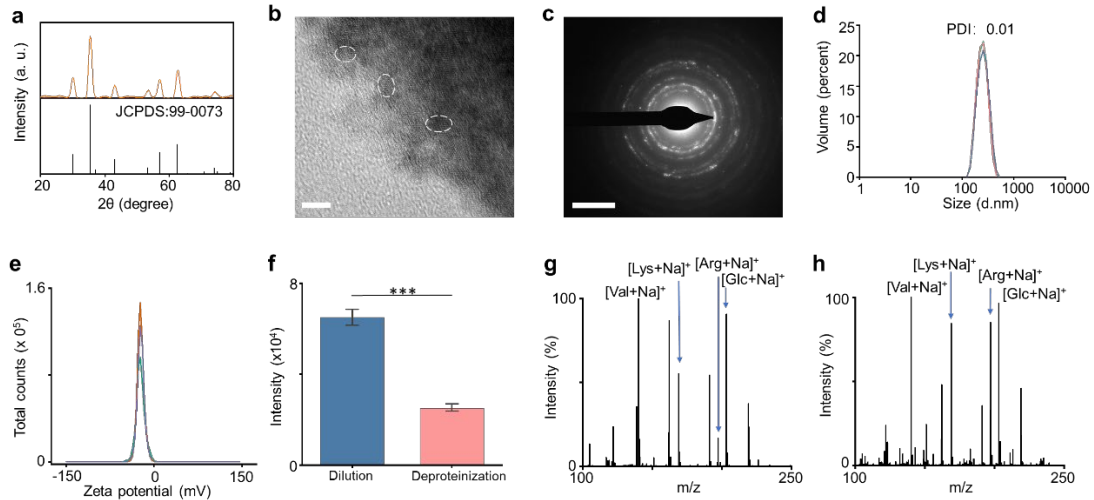

**Figure S1 Characterization of the particles and detection of metabolites.** a) X-ray diffraction patterns of particles with Joint Committee on Powder Diffraction Standards (JCPDS):99-0073 corresponding to  $\text{Fe}_3\text{O}_4$ . b) High resolution transmission electron microscopy (HRTEM) image of the edge region of particle, showing crystal structure as indicated by the white circles. The scale bar represented 5 nm. c) Selected area electron diffraction (SAED) pattern displaying the polycrystalline structure of the particle. The scale bar was  $5\text{nm}^{-1}$ . d) Dynamic light scattering of particles showing the uniform size with polydispersity index of 0.01 by 3 independent measurements. e) The zeta potential of particles displaying a negative charge of the material surface. f) The intensities of typical metabolite (Glucose, Glc) detected by particle assisted laser desorption/ionization mass spectrometry (PALDI-MS) after dilution and deproteinization treatments. The scale bars represented  $\pm$  s.d. of 5 replicates. \*\*\* represented  $p < 0.001$ . Representative mass spectra of 1mg/ml Glc, arginine (Arg), lysine (Lys), and valine (Val) in g) 0.5 mol/L NaCl and h) 5 mg/mL BSA solutions.

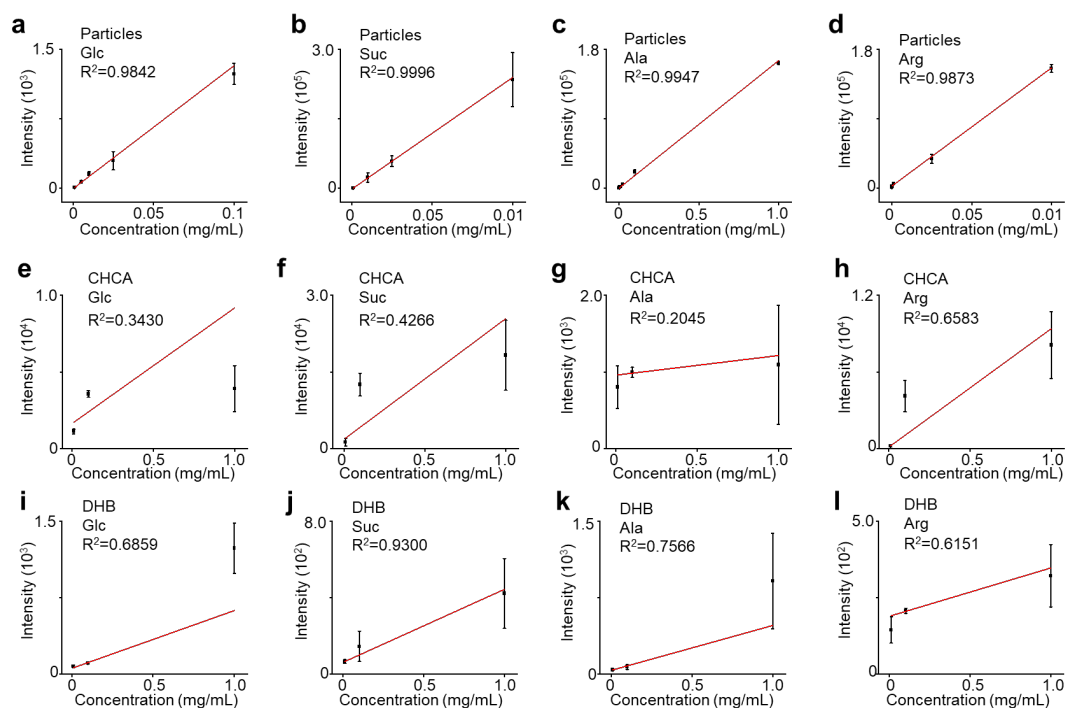

**Figure S2** The calibration curves for detecting typical metabolites. The calibration curves for detecting a) Glc, b) Suc, c) Ala, and d) Arg using particles as the matrix. The calibration curves for detecting e) Glc, f) Suc, g) Ala, and h) Arg using CHCA as the matrix. The calibration curves for detecting i) Glc, j) Suc, k) Ala, and l) Arg using DHB as the matrix.

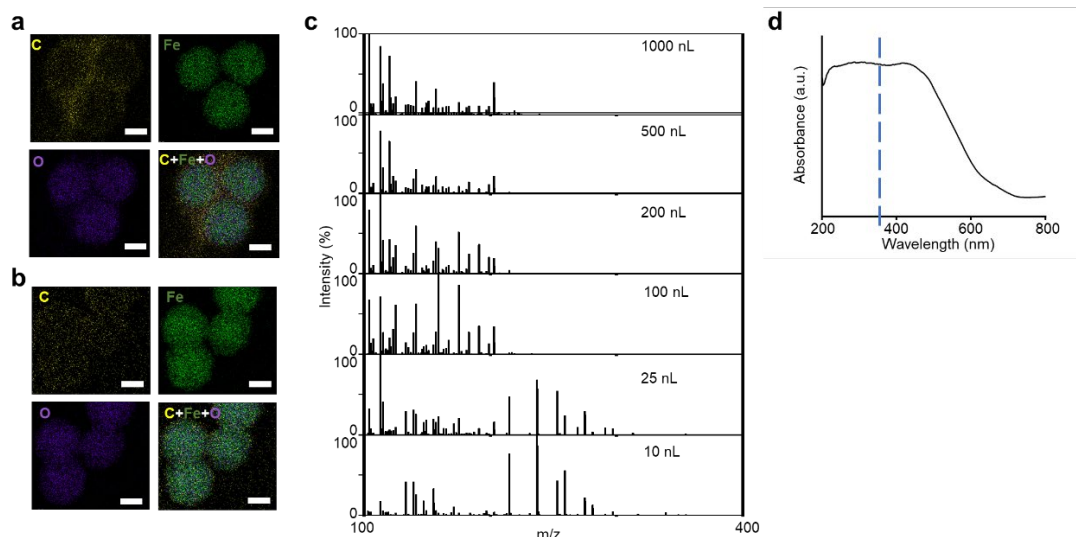

**Figure S3 Characterization of PALDI-MS for sensitive detection.** The elemental mapping results of a) particle-Glc and b) particle-BSA hybrids with carbon (C) element in yellow, ferrum (Fe) element in green, and oxygen (O) element in purple, showing the trapping performance for molecules. The scale bars represented 100 nm. c) The mass spectra of 1000 nL of raw follicular fluid (FF) sample and its dilutions by 2-100 folds using 10-500 nL of raw FF samples at the m/z ranging from 100 to 400 Da. d) The ultraviolet absorption spectrum of particles displaying the absorbance at 355 nm indicated by the blue dotted line.

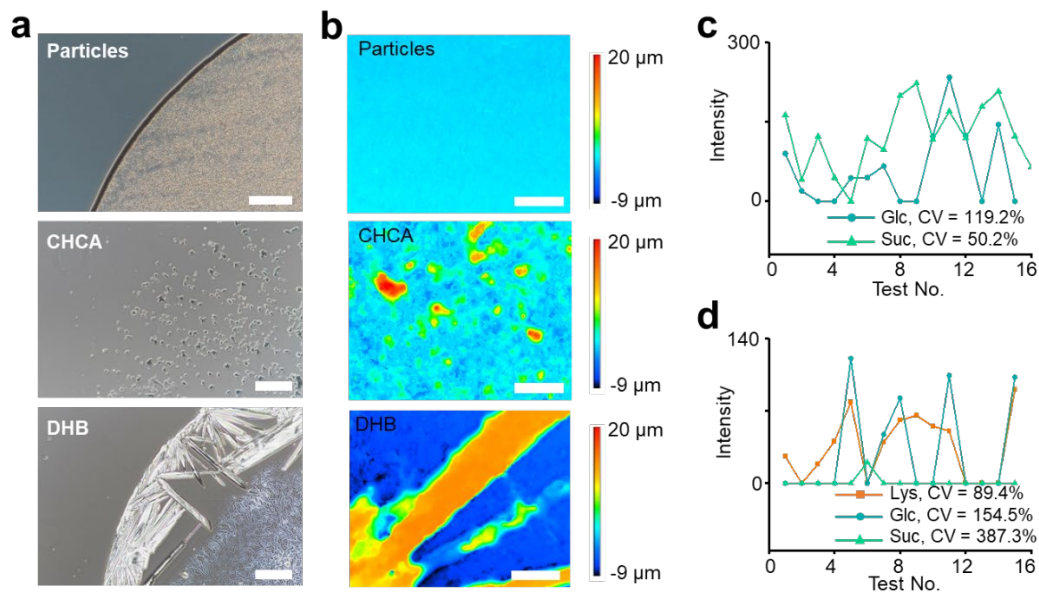

**Figure S4 Characterization of the matrices and the CVs of standard solutions.** a) The bright field images of particles, CHCA and DHB showing the crystallization of matrix. The scale bars of particles, CHCA, and DHB were 100  $\mu\text{m}$ , 200  $\mu\text{m}$ , and 200  $\mu\text{m}$ , respectively. b) The confocal scanning images of matrix-sample co-crystallization using particles, CHCA, and DHB. The scale bar represented 50  $\mu\text{m}$ . The intensities and coefficients of variations (CVs) of intensities for a mixture including lysine (Lys), Glc, and Suc in 15 tests using c) CHCA and d) DHB as the matrix. The Lys was undetectable using CHCA as the matrix.

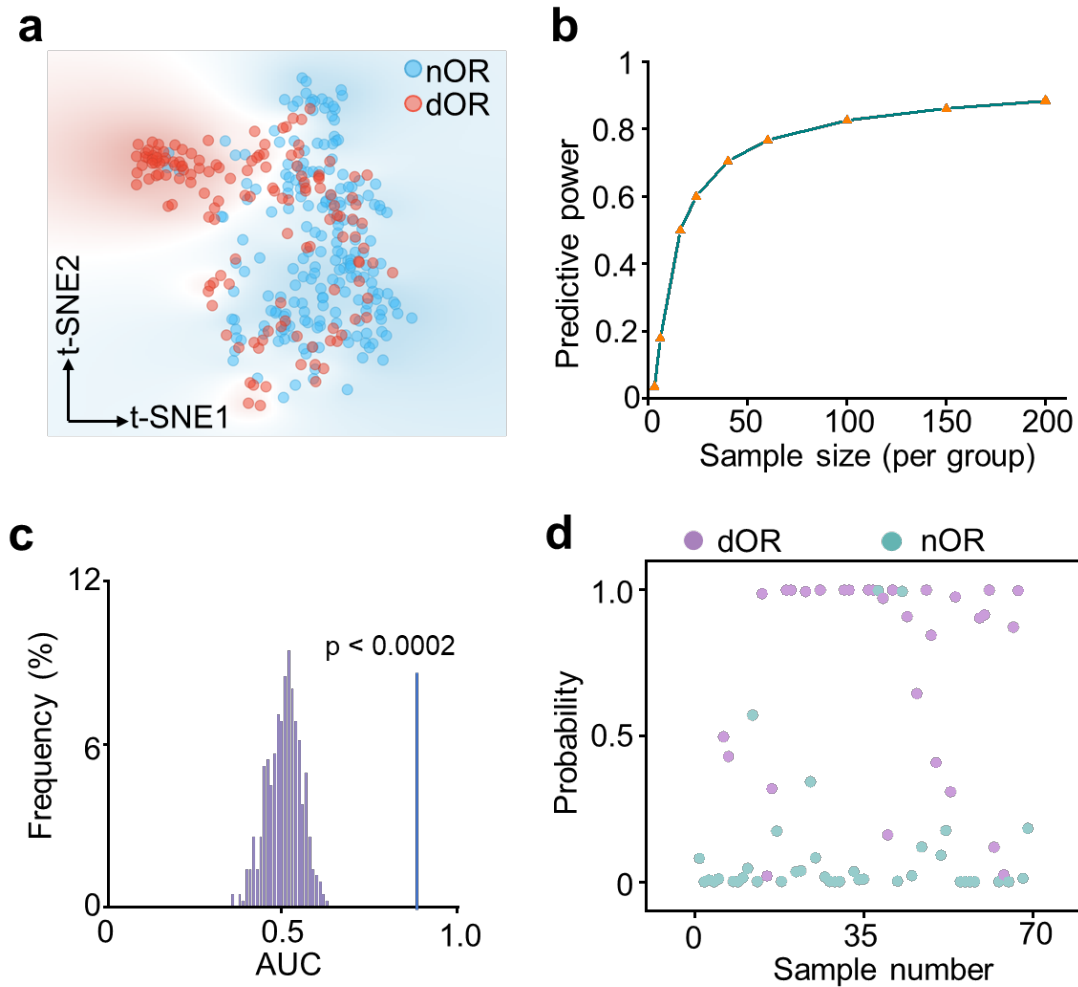

**Figure S5 Characterization of MFFF.** a) The t-distributed stochastic neighbor embedding (t-SNE) of metabolic fingerprinting of FF (MFFF), showing a certain degree of separation for diminished ovarian reserve (dOR) and normal ovarian reserve (nOR) samples. b) The power analysis using MFFF of 10 samples (5/5, dOR/nOR) to calculate the minimum sample size of each group with statistical significance for machine learning. c) The frequency distribution of AUC calculated by 5000 random permutations of RR, showing no overfitting of the model with a significant p-value of  $< 0.0002$ . d) The sample-level plot depicting the probability of RR in the independent validation cohort for differentiating dOR (30, purple dots) from nOR (39, cyan dots).

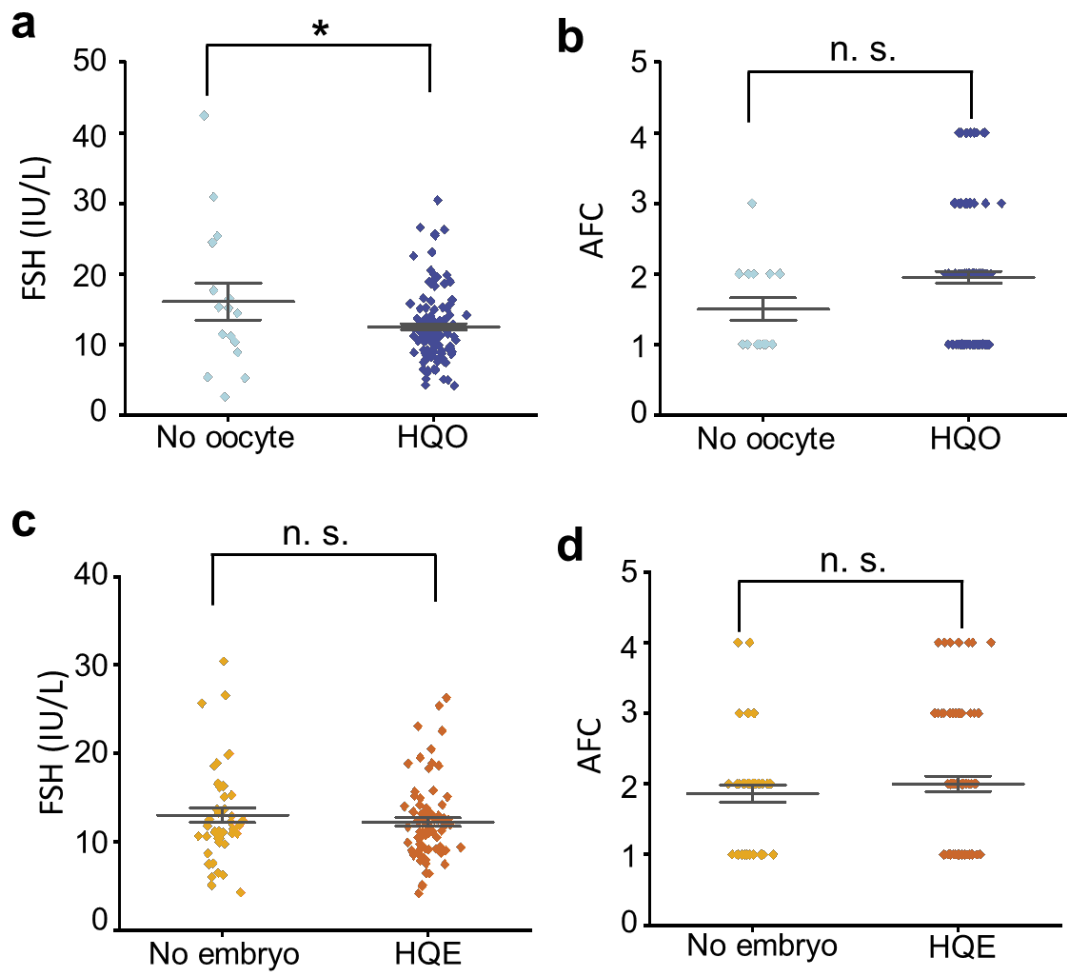

**Figure S6 Fertility prediction based on FSH levels, AFC levels.** The comparison of probability scores for high-quality oocytes (HQO) group and no oocyte group in predicting oocyte quality based on a) follicle-stimulating hormone (FSH) and b) antral follicular count (AFC) levels. \* represented  $p < 0.05$  and n. s. represented no significance. The p value was calculated by a two-tailed t-test. The comparison for probability scores of high-quality embryos (HQE) group and no embryo group in predicting embryo quality based on c) FSH and d) AFC levels. The n. s. represented no significance. The p value was calculated by a two-tailed t-test.



**Table S1** Parameters of regression equations and limit of detection (LOD) for typical metabolites, including alanine (Ala), arginine (Arg), glucose (Glc), and sucrose (Suc).

| Metabolite | Regression equation    | R <sup>2</sup> | LOD (mg/mL) <sup>1</sup> |
|------------|------------------------|----------------|--------------------------|
| Glc        | $y = 2.2E+05x - 84.3$  | 0.9842         | 4.14E-05                 |
| Suc        | $y = 2.4E+05x - 207.1$ | 0.9996         | 1.90E-05                 |
| Ala        | $y = 1.7E+05x + 150.8$ | 0.9946         | 2.77E-05                 |
| Arg        | $y = 1.5E+05x + 286.7$ | 0.9873         | 2.99E-05                 |

1) The signal to noise ratio (S/N) for calculating LOD was 3.

**Table S2** The LOD of particles, CHCA, and DHB using 1  $\mu$ L metabolite solution.

| Metabolites | LOD (pmol) |       |       |
|-------------|------------|-------|-------|
|             | NPs        | CHCA  | DHB   |
| Glc         | 0.23       | 55.6  | 55.6  |
| Suc         | 0.06       | 29.2  | 29.2  |
| Ala         | 0.31       | 112.3 | 112.3 |
| Arg         | 0.17       | 5.7   | 57.4  |

**Table S3** The molecular trapping ratios of particles for typical molecules.

| Molecule | Area | Signal intensities of carbon element |            | Trapping ratio | Mean trapping ratio | p value   |
|----------|------|--------------------------------------|------------|----------------|---------------------|-----------|
|          |      | Surface                              | Background |                |                     |           |
| Glc      | 1    | 28.651                               | 7.116      | 4.03           | 5.4                 | p < 0.001 |
|          | 2    | 24.618                               | 5.630      | 4.37           |                     |           |
|          | 3    | 25.461                               | 3.995      | 6.37           |                     |           |
|          | 4    | 27.461                               | 5.016      | 5.47           |                     |           |
|          | 5    | 31.297                               | 4.754      | 6.58           |                     |           |
| BSA      | 1    | 10.783                               | 4.259      | 2.53           | 2.5                 | p < 0.001 |
|          | 2    | 13.714                               | 5.577      | 2.46           |                     |           |
|          | 3    | 13.100                               | 4.152      | 3.16           |                     |           |
|          | 4    | 7.362                                | 4.561      | 1.61           |                     |           |
|          | 5    | 13.210                               | 4.902      | 2.69           |                     |           |

**Table S4** The clinical information of dOR samples.

| No.    | Age | FSH <sup>1</sup><br>(IU/L) | AMH <sup>2</sup><br>(ng/mL) | AFC <sup>3</sup> | HQO <sup>4</sup> | HQE <sup>5</sup> |
|--------|-----|----------------------------|-----------------------------|------------------|------------------|------------------|
| dOR 1  | 28  | 9.73                       | 0.81                        | 2                | 2                | 0                |
| dOR 2  | 26  | 16.56                      | N/A                         | 2                | 4                | 0                |
| dOR 3  | 23  | 18.60                      | N/A                         | 1                | 5                | 4                |
| dOR 4  | 24  | 10.38                      | 0.62                        | 3                | 2                | 0                |
| dOR 5  | 25  | 12.51                      | N/A                         | 3                | 12               | 4                |
| dOR 6  | 26  | 26.28                      | N/A                         | 1                | 2                | 1                |
| dOR 7  | 26  | 11.23                      | 0.65                        | 1                | 2                | 1                |
| dOR 8  | 27  | 7.92                       | 0.92                        | 2                | 2                | 3                |
| dOR 9  | 28  | 9.90                       | 1.09                        | 3                | 3                | 1                |
| dOR 10 | 28  | 6.25                       | 0.90                        | 1                | 1                | 0                |
| dOR 11 | 28  | 18.84                      | 0.40                        | 4                | 1                | 1                |
| dOR 12 | 28  | 15.08                      | N/A                         | 1                | 2                | 1                |
| dOR 13 | 28  | 11.11                      | N/A                         | 3                | 1                | 1                |
| dOR 14 | 29  | 11.11                      | N/A                         | 1                | 1                | 0                |
| dOR 15 | 29  | 5.37                       | 0.27                        | 1                | 0                | 0                |
| dOR 16 | 30  | 11.83                      | N/A                         | 2                | 4                | 0                |
| dOR 17 | 30  | 14.00                      | 1.00                        | 3                | 6                | 2                |
| dOR 18 | 30  | 11.77                      | N/A                         | 4                | 4                | 0                |
| dOR 19 | 30  | 13.41                      | N/A                         | 3                | 6                | 1                |
| dOR 20 | 31  | 9.74                       | 0.53                        | 4                | 1                | 1                |
| dOR 21 | 31  | 25.36                      | 0.35                        | 3                | 0                | 0                |
| dOR 22 | 31  | 9.18                       | 0.52                        | 2                | 5                | 1                |
| dOR 23 | 31  | 10.70                      | 1.11                        | 2                | 6                | 3                |
| dOR 24 | 31  | 8.61                       | 0.27                        | 1                | 2                | 2                |
| dOR 25 | 31  | 11.88                      | 1.01                        | 3                | 2                | 1                |
| dOR 26 | 31  | 10.46                      | 0.05                        | 1                | 1                | 1                |
| dOR 27 | 31  | 8.86                       | 1.06                        | 2                | 1                | 1                |
| dOR 28 | 31  | 10.62                      | N/A                         | 2                | 1                | 0                |
| dOR 29 | 31  | 4.95                       | 0.31                        | 2                | 3                | 1                |
| dOR 30 | 32  | 12.52                      | N/A                         | 4                | 7                | 4                |
| dOR 31 | 32  | 14.42                      | 1.43                        | 1                | 0                | 0                |
| dOR 32 | 32  | 23.06                      | 1.10                        | 1                | 2                | 2                |
| dOR 33 | 32  | 7.44                       | 0.99                        | 2                | 3                | 3                |
| dOR 34 | 33  | 8.68                       | 0.70                        | 1                | 1                | 0                |
| dOR 35 | 33  | 13.22                      | 0.71                        | 2                | 2                | 0                |
| dOR 36 | 34  | 12.52                      | 1.14                        | 1                | 4                | 2                |
| dOR 37 | 34  | 9.36                       | 0.40                        | 4                | 3                | 2                |
| dOR 38 | 34  | 9.42                       | 1.04                        | 3                | 3                | 3                |
| dOR 39 | 34  | 12.79                      | N/A                         | 1                | 1                | 1                |
| dOR 40 | 35  | 12.70                      | N/A                         | 3                | 1                | 1                |
| dOR 41 | 35  | 9.10                       | 0.36                        | 4                | 2                | 2                |

|        |    |       |      |   |    |   |
|--------|----|-------|------|---|----|---|
| dOR 42 | 35 | 18.29 | 0.25 | 1 | 2  | 1 |
| dOR 43 | 35 | 22.54 | 0.23 | 1 | 1  | 1 |
| dOR 44 | 35 | 13.51 | 1.52 | 1 | 4  | 3 |
| dOR 45 | 36 | 5.05  | 0.17 | 1 | 1  | 0 |
| dOR 46 | 36 | 10.98 | N/A  | 2 | 1  | 1 |
| dOR 47 | 36 | 25.66 | N/A  | 1 | 1  | 0 |
| dOR 48 | 36 | 7.87  | 0.53 | 1 | 3  | 3 |
| dOR 49 | 36 | 8.45  | 0.45 | 3 | 11 | 2 |
| dOR 50 | 36 | 15.68 | N/A  | 1 | 1  | 1 |
| dOR 51 | 36 | 24.42 | N/A  | 1 | 0  | 0 |
| dOR 52 | 36 | 13.18 | N/A  | 2 | 5  | 1 |
| dOR 53 | 36 | 13.80 | N/A  | 1 | 2  | 1 |
| dOR 54 | 37 | 30.90 | 0.25 | 2 | 0  | 0 |
| dOR 55 | 37 | 26.55 | N/A  | 2 | 3  | 0 |
| dOR 56 | 37 | 9.91  | 0.40 | 1 | 2  | 0 |
| dOR 57 | 37 | 12.97 | N/A  | 2 | 1  | 1 |
| dOR 58 | 37 | 5.22  | 0.58 | 2 | 0  | 0 |
| dOR 59 | 38 | 18.88 | N/A  | 1 | 1  | 0 |
| dOR 60 | 38 | 15.18 | 0.48 | 4 | 3  | 1 |
| dOR 61 | 38 | 14.15 | N/A  | 3 | 5  | 3 |
| dOR 62 | 38 | 10.60 | N/A  | 1 | 2  | 0 |
| dOR 63 | 39 | 8.96  | 0.14 | 1 | 3  | 3 |
| dOR 64 | 39 | 12.36 | N/A  | 1 | 3  | 3 |
| dOR 65 | 39 | 25.39 | N/A  | 1 | 2  | 2 |
| dOR 66 | 39 | 15.07 | 0.78 | 3 | 3  | 0 |
| dOR 67 | 39 | 10.96 | 0.74 | 2 | 2  | 0 |
| dOR 68 | 39 | 2.59  | 0.12 | 1 | 0  | 0 |
| dOR 69 | 39 | 7.52  | 0.80 | 2 | 4  | 4 |
| dOR 70 | 39 | 19.96 | N/A  | 2 | 1  | 0 |
| dOR 71 | 40 | 6.37  | 0.84 | 3 | 7  | 4 |
| dOR 72 | 40 | 12.93 | N/A  | 1 | 1  | 1 |
| dOR 73 | 40 | 14.17 | N/A  | 4 | 2  | 1 |
| dOR 74 | 40 | 12.23 | 0.91 | 1 | 2  | 0 |
| dOR 75 | 40 | 16.51 | 0.49 | 1 | 0  | 0 |
| dOR 76 | 38 | 4.24  | 0.40 | 2 | 2  | 0 |
| dOR 77 | 40 | 15.78 | N/A  | 2 | 2  | 1 |
| dOR 78 | 40 | 10.49 | N/A  | 1 | 4  | 2 |
| dOR 79 | 41 | 4.14  | 0.55 | 1 | 2  | 2 |
| dOR 80 | 41 | 8.75  | 0.79 | 2 | 5  | 2 |
| dOR 81 | 41 | 6.44  | 0.68 | 2 | 4  | 1 |
| dOR 82 | 41 | 9.21  | 0.39 | 3 | 4  | 2 |
| dOR 83 | 36 | 7.83  | 0.01 | 3 | 4  | 1 |
| dOR 84 | 36 | 19.51 | 0.69 | 2 | 4  | 1 |
| dOR 85 | 41 | 15.27 | N/A  | 1 | 1  | 0 |

|         |    |       |      |   |     |     |
|---------|----|-------|------|---|-----|-----|
| dOR 86  | 41 | 12.83 | N/A  | 2 | 2   | 2   |
| dOR 87  | 42 | 12.93 | N/A  | 2 | 5   | 1   |
| dOR 88  | 42 | 8.19  | 0.76 | 2 | 2   | 1   |
| dOR 89  | 42 | 11.85 | N/A  | 2 | 1   | 1   |
| dOR 90  | 43 | 13.67 | 0.95 | 3 | 3   | 0   |
| dOR 91  | 43 | 12.90 | N/A  | 2 | 5   | 0   |
| dOR 92  | 43 | 10.89 | N/A  | 2 | 3   | 0   |
| dOR 93  | 44 | 11.91 | N/A  | 1 | 1   | 1   |
| dOR 94  | 44 | 7.53  | 0.39 | 2 | 1   | 0   |
| dOR 95  | 45 | 7.46  | 0.93 | 2 | 3   | 0   |
| dOR 96  | 47 | 13.65 | 0.56 | 1 | 2   | 0   |
| dOR 97  | 29 | 11.49 | 0.58 | 1 | 2   | 1   |
| dOR 98  | 30 | 17.66 | 0.10 | 2 | 0   | 0   |
| dOR 99  | 31 | 11.16 | N/A  | 1 | 0   | 0   |
| dOR 100 | 31 | 11.10 | 0.65 | 2 | 1   | 1   |
| dOR 101 | 32 | 5.10  | 0.46 | 3 | 2   | 2   |
| dOR 102 | 37 | 9.00  | 0.97 | 3 | 1   | 1   |
| dOR 103 | 40 | 20.49 | 0.67 | 3 | 3   | 1   |
| dOR 104 | 35 | 12.39 | N/A  | 1 | 2   | 1   |
| dOR 105 | 39 | 11.42 | 0.44 | 1 | 0   | 0   |
| dOR 106 | 32 | 11.13 | N/A  | 2 | 6   | 3   |
| dOR 107 | 34 | 8.99  | 0.62 | 2 | 1   | 1   |
| dOR 108 | 34 | 12.89 | 0.16 | 1 | 2   | 1   |
| dOR 109 | 35 | 10.56 | N/A  | 2 | 2   | 2   |
| dOR 110 | 40 | 16.31 | N/A  | 2 | 1   | 0   |
| dOR 111 | 41 | 14.93 | N/A  | 1 | 4   | 2   |
| dOR 112 | 39 | 11.42 | 0.44 | 1 | 3   | 0   |
| dOR 113 | 41 | 12.37 | N/A  | 1 | 3   | 1   |
| dOR 114 | 42 | 12.41 | N/A  | 1 | 1   | 0   |
| dOR 115 | 43 | 12.35 | N/A  | 1 | 1   | 1   |
| dOR 116 | 44 | 11.81 | N/A  | 2 | 4   | 4   |
| dOR 117 | 45 | 6.00  | 0.43 | 1 | 1   | 0   |
| dOR 118 | 47 | 10.39 | N/A  | 4 | 1   | 0   |
| dOR 119 | 49 | 13.38 | 0.47 | 1 | 1   | 1   |
| dOR 120 | 53 | 16.50 | 0.50 | 1 | N/A | N/A |
| dOR 121 | 49 | 13.37 | 0.38 | 2 | 3   | 0   |
| dOR 122 | 51 | 19.83 | 0.48 | 2 | 1   | 0   |
| dOR 123 | 49 | 11.22 | N/A  | 2 | 2   | 0   |
| dOR 124 | 47 | 11.08 | N/A  | 3 | 3   | 0   |
| dOR 125 | 48 | 18.59 | 0.15 | 2 | 2   | 0   |
| dOR 126 | 43 | 12.50 | 0.78 | 3 | 1   | 0   |
| dOR 127 | 43 | 42.43 | N/A  | 2 | 0   | 0   |
| dOR 128 | 43 | 10.36 | N/A  | 2 | 0   | 0   |
| dOR 129 | 42 | 11.68 | N/A  | 3 | 6   | 3   |

|         |    |       |      |   |     |     |
|---------|----|-------|------|---|-----|-----|
| dOR 130 | 41 | 30.43 | N/A  | 1 | 1   | 0   |
| dOR 131 | 41 | 12.37 | N/A  | 2 | 4   | 3   |
| dOR 132 | 54 | 6.47  | 0.48 | 2 | 4   | 0   |
| dOR 133 | 54 | 14.78 | N/A  | 2 | N/A | N/A |
| dOR 134 | 40 | 8.21  | 0.36 | 2 | 3   | 1   |
| dOR 135 | 51 | 15.15 | N/A  | 1 | 0   | 0   |
| dOR 136 | 51 | 15.30 | N/A  | 2 | 0   | 0   |
| dOR 137 | 48 | 13.15 | 1.36 | 1 | 3   | 1   |
| dOR 138 | 49 | 18.88 | 1.04 | 1 | 1   | 1   |
| dOR 139 | 46 | 8.85  | 0.32 | 1 | 0   | 0   |
| dOR 140 | 47 | 16.16 | 0.28 | 2 | 2   | 0   |
| dOR 141 | 45 | 12.13 | 0.70 | 2 | 1   | 0   |

---

1) FSH represented basal follicle-stimulating hormone.

2) AMH represented antimüllerian hormone. N/A represented that the information was unknown.

3) AFC represented antral follicular count.

4) HQO represented high-quality oocytes.

5) HQE represented high-quality embryos.

**Table S5** The clinical information of nOR samples.

| No.    | Age | FSH <sup>1</sup><br>(IU/L) | AMH <sup>2</sup><br>(ng/mL) | AFC <sup>3</sup> |
|--------|-----|----------------------------|-----------------------------|------------------|
| nOR 1  | 39  | 5.87                       | N/A                         | 12               |
| nOR 2  | 25  | 6.72                       | N/A                         | 11               |
| nOR 3  | 37  | 9.57                       | N/A                         | 5                |
| nOR 4  | 38  | 6.35                       | N/A                         | 5                |
| nOR 5  | 26  | 8.10                       | N/A                         | 5                |
| nOR 6  | 27  | 6.56                       | N/A                         | 9                |
| nOR 7  | 43  | 8.31                       | N/A                         | 5                |
| nOR 8  | 27  | 6.81                       | 4.94                        | 2                |
| nOR 9  | 27  | 6.73                       | N/A                         | 5                |
| nOR 10 | 28  | 8.67                       | N/A                         | 9                |
| nOR 11 | 28  | 6.25                       | N/A                         | 12               |
| nOR 12 | 28  | 6.69                       | N/A                         | 6                |
| nOR 13 | 28  | 7.93                       | N/A                         | 5                |
| nOR 14 | 34  | 6.97                       | N/A                         | 5                |
| nOR 15 | 29  | 5.25                       | N/A                         | 7                |
| nOR 16 | 29  | 8.63                       | 3.33                        | 11               |
| nOR 17 | 29  | 9.34                       | N/A                         | 12               |
| nOR 18 | 29  | 9.59                       | 8.96                        | 12               |
| nOR 19 | 30  | 7.89                       | N/A                         | 8                |
| nOR 20 | 30  | 5.90                       | N/A                         | 9                |
| nOR 21 | 30  | 9.16                       | N/A                         | 6                |
| nOR 22 | 30  | 7.52                       | 2.03                        | 7                |
| nOR 23 | 30  | 5.87                       | N/A                         | 7                |
| nOR 24 | 30  | 8.38                       | N/A                         | 11               |
| nOR 25 | 30  | 8.65                       | N/A                         | 6                |
| nOR 26 | 30  | 8.05                       | N/A                         | 12               |
| nOR 27 | 30  | 6.22                       | N/A                         | 7                |
| nOR 28 | 35  | 7.09                       | 6.21                        | 9                |
| nOR 29 | 30  | 9.58                       | N/A                         | 10               |
| nOR 30 | 31  | 4.05                       | N/A                         | 12               |
| nOR 31 | 31  | 6.59                       | N/A                         | 7                |
| nOR 32 | 31  | 3.84                       | N/A                         | 12               |
| nOR 33 | 31  | 5.18                       | N/A                         | 12               |
| nOR 34 | 31  | 6.73                       | N/A                         | 5                |
| nOR 35 | 31  | 7.39                       | N/A                         | 11               |
| nOR 36 | 31  | 8.32                       | N/A                         | 11               |
| nOR 37 | 31  | 7.18                       | N/A                         | 12               |
| nOR 38 | 35  | 5.86                       | N/A                         | 6                |
| nOR 39 | 31  | 5.51                       | N/A                         | 11               |
| nOR 40 | 31  | 9.17                       | N/A                         | 10               |
| nOR 41 | 31  | 6.38                       | N/A                         | 5                |



|        |    |      |      |    |
|--------|----|------|------|----|
| nOR 42 | 31 | 6.07 | N/A  | 8  |
| nOR 43 | 33 | 6.06 | N/A  | 6  |
| nOR 44 | 32 | 7.34 | 2.55 | 7  |
| nOR 45 | 32 | 5.81 | N/A  | 7  |
| nOR 46 | 32 | 5.71 | N/A  | 10 |
| nOR 47 | 33 | 5.73 | N/A  | 9  |
| nOR 48 | 32 | 7.14 | N/A  | 8  |
| nOR 49 | 32 | 7.27 | N/A  | 7  |
| nOR 50 | 32 | 7.64 | N/A  | 9  |
| nOR 51 | 32 | 7.19 | N/A  | 11 |
| nOR 52 | 32 | 6.50 | N/A  | 12 |
| nOR 53 | 32 | 6.20 | N/A  | 6  |
| nOR 54 | 32 | 5.70 | N/A  | 7  |
| nOR 55 | 32 | 6.71 | N/A  | 12 |
| nOR 56 | 32 | 8.55 | N/A  | 8  |
| nOR 57 | 32 | 5.15 | N/A  | 11 |
| nOR 58 | 32 | 7.32 | N/A  | 12 |
| nOR 59 | 33 | 3.81 | N/A  | 7  |
| nOR 60 | 33 | 5.63 | N/A  | 6  |
| nOR 61 | 33 | 7.90 | N/A  | 5  |
| nOR 62 | 33 | 6.49 | 3.98 | 9  |
| nOR 63 | 33 | 6.78 | N/A  | 12 |
| nOR 64 | 33 | 7.47 | N/A  | 7  |
| nOR 65 | 33 | 9.26 | N/A  | 6  |
| nOR 66 | 33 | 6.58 | N/A  | 12 |
| nOR 67 | 33 | 6.82 | N/A  | 5  |
| nOR 68 | 33 | 6.68 | N/A  | 9  |
| nOR 69 | 33 | 7.98 | N/A  | 11 |
| nOR 70 | 33 | 7.07 | N/A  | 5  |
| nOR 71 | 33 | 6.06 | N/A  | 6  |
| nOR 72 | 34 | 6.82 | N/A  | 6  |
| nOR 73 | 34 | 8.36 | N/A  | 9  |
| nOR 74 | 34 | 3.78 | N/A  | 5  |
| nOR 75 | 34 | 7.95 | N/A  | 12 |
| nOR 76 | 34 | 6.06 | N/A  | 10 |
| nOR 77 | 34 | 8.08 | N/A  | 12 |
| nOR 78 | 34 | 6.72 | N/A  | 12 |
| nOR 79 | 34 | 6.38 | 1.92 | 5  |
| nOR 80 | 34 | 6.04 | N/A  | 5  |
| nOR 81 | 34 | 5.84 | N/A  | 9  |
| nOR 82 | 34 | 6.62 | N/A  | 5  |
| nOR 83 | 34 | 8.19 | N/A  | 12 |
| nOR 84 | 34 | 5.93 | N/A  | 8  |
| nOR 85 | 34 | 6.04 | N/A  | 6  |

|         |    |      |      |    |
|---------|----|------|------|----|
| nOR 86  | 34 | 6.47 | N/A  | 7  |
| nOR 87  | 34 | 9.57 | N/A  | 8  |
| nOR 88  | 34 | 5.14 | N/A  | 12 |
| nOR 89  | 34 | 9.26 | N/A  | 5  |
| nOR 90  | 35 | 6.76 | N/A  | 11 |
| nOR 91  | 35 | 6.67 | N/A  | 8  |
| nOR 92  | 35 | 8.72 | N/A  | 8  |
| nOR 93  | 35 | 7.96 | N/A  | 12 |
| nOR 94  | 35 | 6.91 | N/A  | 7  |
| nOR 95  | 35 | 6.52 | N/A  | 6  |
| nOR 96  | 35 | 4.27 | N/A  | 8  |
| nOR 97  | 35 | 4.84 | N/A  | 6  |
| nOR 98  | 35 | 6.48 | N/A  | 6  |
| nOR 99  | 36 | 7.84 | N/A  | 5  |
| nOR 100 | 36 | 6.93 | N/A  | 9  |
| nOR 101 | 36 | 4.93 | N/A  | 6  |
| nOR 102 | 36 | 5.57 | N/A  | 10 |
| nOR 103 | 36 | 7.82 | N/A  | 9  |
| nOR 104 | 36 | 5.30 | N/A  | 8  |
| nOR 105 | 36 | 5.58 | N/A  | 7  |
| nOR 106 | 36 | 5.52 | N/A  | 12 |
| nOR 107 | 37 | 2.93 | N/A  | 12 |
| nOR 108 | 37 | 9.13 | 3.29 | 4  |
| nOR 109 | 37 | 7.34 | N/A  | 11 |
| nOR 110 | 37 | 7.56 | 1.29 | 4  |
| nOR 111 | 37 | 6.89 | N/A  | 10 |
| nOR 112 | 37 | 8.47 | N/A  | 5  |
| nOR 113 | 37 | 6.36 | N/A  | 12 |
| nOR 114 | 37 | 7.38 | N/A  | 9  |
| nOR 115 | 37 | 5.99 | N/A  | 6  |
| nOR 116 | 37 | 2.73 | N/A  | 12 |
| nOR 117 | 38 | 7.45 | N/A  | 7  |
| nOR 118 | 38 | 5.70 | N/A  | 9  |
| nOR 119 | 38 | 7.00 | N/A  | 8  |
| nOR 120 | 38 | 2.22 | N/A  | 11 |
| nOR 121 | 39 | 9.47 | N/A  | 12 |
| nOR 122 | 39 | 7.25 | N/A  | 5  |
| nOR 123 | 39 | 9.94 | N/A  | 7  |
| nOR 124 | 39 | 3.33 | N/A  | 12 |
| nOR 125 | 40 | 6.33 | N/A  | 8  |
| nOR 126 | 40 | 3.41 | N/A  | 12 |
| nOR 127 | 40 | 9.70 | N/A  | 7  |
| nOR 128 | 40 | 8.82 | N/A  | 5  |
| nOR 129 | 40 | 5.96 | N/A  | 6  |

|         |    |      |      |    |
|---------|----|------|------|----|
| nOR 130 | 40 | 6.55 | N/A  | 6  |
| nOR 131 | 42 | 9.87 | 5.52 | 9  |
| nOR 132 | 42 | 6.85 | N/A  | 5  |
| nOR 133 | 43 | 8.35 | N/A  | 5  |
| nOR 134 | 43 | 9.25 | N/A  | 5  |
| nOR 135 | 43 | 7.43 | N/A  | 10 |
| nOR 136 | 44 | 6.24 | 3.74 | 6  |
| nOR 137 | 40 | 4.94 | N/A  | 7  |
| nOR 138 | 40 | 6.02 | N/A  | 12 |
| nOR 139 | 25 | 8.92 | N/A  | 6  |
| nOR 140 | 27 | 6.17 | N/A  | 8  |
| nOR 141 | 36 | 7.50 | N/A  | 7  |
| nOR 142 | 36 | 9.88 | N/A  | 6  |
| nOR 143 | 36 | 5.16 | N/A  | 6  |
| nOR 144 | 37 | 7.31 | N/A  | 6  |
| nOR 145 | 34 | 4.60 | N/A  | 8  |
| nOR 146 | 34 | 8.59 | N/A  | 5  |
| nOR 147 | 34 | 6.75 | N/A  | 7  |
| nOR 148 | 34 | 6.74 | N/A  | 7  |
| nOR 149 | 33 | 6.42 | 1.15 | 4  |
| nOR 150 | 32 | 3.70 | N/A  | 7  |
| nOR 151 | 22 | 7.82 | N/A  | 6  |
| nOR 152 | 26 | 4.06 | N/A  | 10 |
| nOR 153 | 28 | 5.80 | N/A  | 12 |
| nOR 154 | 29 | 6.75 | 4.4  | 5  |
| nOR 155 | 29 | 7.84 | N/A  | 5  |
| nOR 156 | 30 | 5.67 | N/A  | 5  |
| nOR 157 | 30 | 7.50 | N/A  | 5  |
| nOR 158 | 30 | 6.09 | N/A  | 9  |
| nOR 159 | 30 | 6.20 | N/A  | 5  |
| nOR 160 | 31 | 8.30 | N/A  | 7  |
| nOR 161 | 31 | 7.11 | N/A  | 12 |
| nOR 162 | 31 | 9.20 | N/A  | 11 |
| nOR 163 | 31 | 9.37 | N/A  | 7  |
| nOR 164 | 32 | 6.45 | N/A  | 12 |
| nOR 165 | 32 | 7.52 | N/A  | 9  |
| nOR 166 | 31 | 5.30 | N/A  | 12 |
| nOR 167 | 29 | 5.52 | N/A  | 7  |
| nOR 168 | 30 | 3.21 | N/A  | 7  |
| nOR 169 | 22 | 8.72 | N/A  | 8  |
| nOR 170 | 26 | 6.88 | N/A  | 12 |
| nOR 171 | 26 | 5.96 | N/A  | 6  |
| nOR 172 | 27 | 5.78 | N/A  | 11 |
| nOR 173 | 27 | 6.70 | N/A  | 12 |

|         |    |      |      |    |
|---------|----|------|------|----|
| nOR 174 | 25 | 5.62 | N/A  | 7  |
| nOR 175 | 27 | 7.51 | N/A  | 6  |
| nOR 176 | 28 | 7.42 | N/A  | 6  |
| nOR 177 | 28 | 6.17 | N/A  | 6  |
| nOR 178 | 29 | 5.47 | N/A  | 9  |
| nOR 179 | 29 | 6.08 | N/A  | 7  |
| nOR 180 | 29 | 7.87 | N/A  | 9  |
| nOR 181 | 26 | 6.07 | N/A  | 5  |
| nOR 182 | 30 | 9.74 | N/A  | 9  |
| nOR 183 | 31 | 7.81 | N/A  | 8  |
| nOR 184 | 31 | 9.29 | 4.71 | 7  |
| nOR 185 | 32 | 9.89 | N/A  | 10 |
| nOR 186 | 32 | 5.62 | N/A  | 8  |
| nOR 187 | 26 | 7.07 | N/A  | 12 |
| nOR 188 | 27 | 6.93 | N/A  | 6  |

---

1) FSH represented basal follicle-stimulating hormone.

2) AMH represented antimüllerian hormone. N/A represented that the information was unknown.

3) AFC represented antral follicular count.

**Table S6** The age match of dOR and nOR samples in the discovery cohort.

|                  | Category       | dOR          | nOR          | p value <sup>1</sup> |
|------------------|----------------|--------------|--------------|----------------------|
| Discovery cohort | Age (SD, year) | 35.15 (5.11) | 34.10 (4.07) | 0.06                 |

1) The p value was calculated by a two-tailed t-test.

**Table S7** The model performance for dOR diagnosis using ridge regression (RR), neural network (NN), support vector machine (SVM), and random forest (RF).

| Algorithms | Accuracy<br>(Acc) | Sensitivity<br>(Sen) | Precision<br>(Pre) | F1 score <sup>1</sup><br>(F1) |
|------------|-------------------|----------------------|--------------------|-------------------------------|
| RR         | 0.829             | 0.775                | 0.796              | 0.785                         |
| NN         | 0.800             | 0.649                | 0.818              | 0.724                         |
| SVM        | 0.767             | 0.541                | 0.822              | 0.652                         |
| RF         | 0.764             | 0.613                | 0.756              | 0.677                         |

1) The F1 scores were calculated by the harmonic mean of sensitivity and precision.

**Table S8** Model performance of the area under the curve (AUC) for dOR diagnosis in the discovery and independent validation cohorts.

| Algorithms | Discovery cohort<br>(95% CI) <sup>1</sup> | Validation cohort<br>(95% CI) |
|------------|-------------------------------------------|-------------------------------|
| RR         | 0.905<br>(0.870-0.940)                    | 0.929<br>(0.867-0.991)        |
| NN         | 0.856<br>(0.812-0.900)                    | 0.924<br>(0.855-0.993)        |
| SVM        | 0.847<br>(0.801-0.893)                    | 0.905<br>(0.833-0.978)        |
| RF         | 0.796<br>(0.744-0.849)                    | 0.874<br>(0.784-0.963)        |

1) CI represent confidence interval.

**Table S9** Biomarker validation using FT-ICR-MS.

| Metabolites                                         | Molecular formula                               | Theoretical m/z value | Mass error (ppm) <sup>1</sup> | p value <sup>2</sup> |
|-----------------------------------------------------|-------------------------------------------------|-----------------------|-------------------------------|----------------------|
| Lactic acid (LA)                                    | C <sub>3</sub> H <sub>6</sub> O <sub>3</sub>    | 135.0029              | 5.19                          | 2.04E-24             |
| Succinic acid (SA)                                  | C <sub>4</sub> H <sub>6</sub> O <sub>4</sub>    | 156.9898              | 1.97                          | 5.86E-08             |
| Pyruvic acid (PA)                                   | C <sub>3</sub> H <sub>4</sub> O <sub>3</sub>    | 164.9351              | 1.64                          | 4.55E-02             |
| Glucose (Glc)                                       | C <sub>6</sub> H <sub>12</sub> O <sub>6</sub>   | 203.0526              | 3.20                          | 8.29E-04             |
| Fructose 6-phosphate /Glucose 6-phosphate (F6P/G6P) | C <sub>6</sub> H <sub>13</sub> O <sub>9</sub> P | 283.0189              | 0.94                          | 3.54E-16             |

1) The ppm value was calculated according to the measured and theoretical values of m/z feature.

2) The p value was calculated using the average intensity between the dOR and nOR groups by two-tailed t-test.



**Table S10** Biomarker validation by LC MS.

| Metabolites | Molecular formula                               | Detection mode | Theoretical m/z value | Retention time (min) | Mass error (ppm) <sup>1</sup> |
|-------------|-------------------------------------------------|----------------|-----------------------|----------------------|-------------------------------|
| LA          | C <sub>3</sub> H <sub>6</sub> O <sub>3</sub>    | Negative mode  | 89.02                 | 2.99                 | -0.02                         |
| SA          | C <sub>4</sub> H <sub>6</sub> O <sub>4</sub>    | Negative mode  | 117.02                | 6.97                 | 1.26                          |
| PA          | C <sub>3</sub> H <sub>4</sub> O <sub>3</sub>    | Negative mode  | 87.01                 | 2.18                 | -0.31                         |
| Glc         | C <sub>6</sub> H <sub>12</sub> O <sub>6</sub>   | Negative mode  | 179.06                | 3.60                 | 1.51                          |
| F6P/G6P     | C <sub>6</sub> H <sub>13</sub> O <sub>9</sub> P | Negative mode  | 259.02                | 8.12                 | -2.16                         |

1) The ppm value was calculated according to the measured and theoretical values of m/z feature.

**Table S11** Biomarker panel constructed for dOR diagnosis.

| Metabolites | p value <sup>1</sup> | AUC<br>(95% CI)        |
|-------------|----------------------|------------------------|
| LA          | 3.00E-4              | 0.765<br>(0.716-0.815) |
| SA          | < 4.00E-13           | 0.571<br>(0.510-0.632) |
| PA          | 4.63E-13             | 0.599<br>(0.539-0.660) |
| Glc         | 2.34E-9              | 0.637<br>(0.577-0.696) |
| F6P/G6P     | 2.70E-4              | 0.803<br>(0.756-0.850) |
| Panel       | /                    | 0.849<br>(0.809-0.890) |

1) The p value was calculated by the AUCs between single biomarker and biomarker panel through Delong test.
